# Supplementary material for: Effects of Soil pH on Gaseous Nitrogen Loss Pathway via Feammox Process
Source: MDPI journal article supplement (doi:10.3390/su131810393), 2021-09-17
Supplement: s1 [file s1]

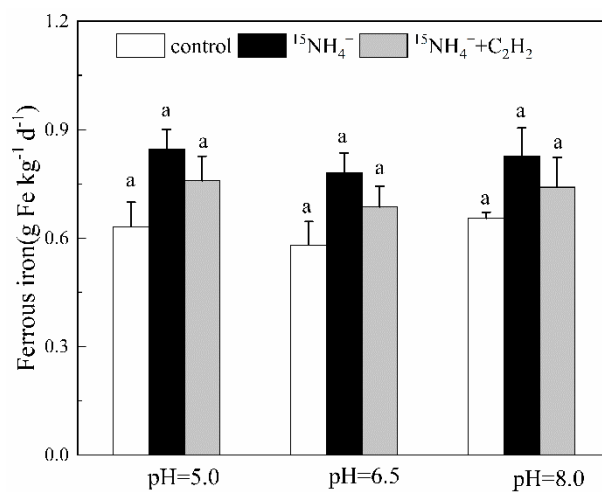

**Figure S1.** Fe(III) reduction rates measured in the isotope tracer incubations. The different small letters above the column denote statistically significant ( $P < 0.05$ ) differences in different pH groups.

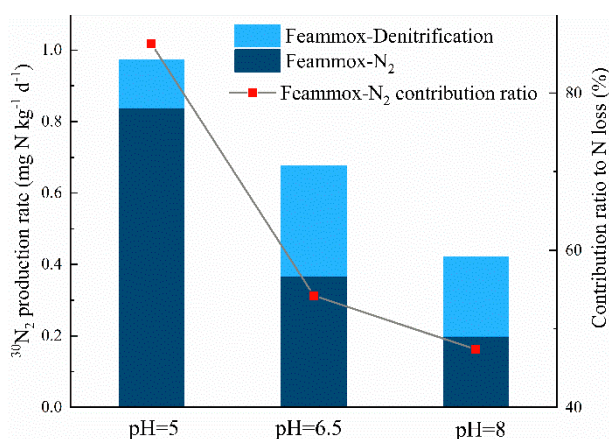

**Figure S2.** The contribution of Feammox to N<sub>2</sub> pathway (Feammox-N<sub>2</sub>) to gaseous N loss.

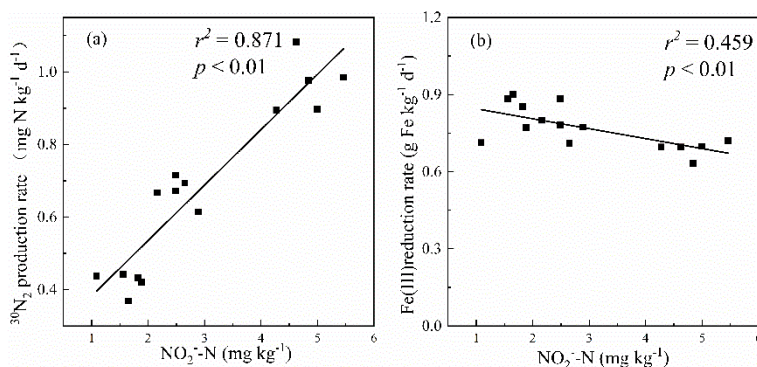

**Figure S3.** Pearson's correlations of nitrite concentrations with both Feammox rates (a) and Fe(III) reduction rates (b).

**Table S1** Researches on Feammox in natural environments

|                     | Soil pH   | Microbially reducible<br>Fe(III) /g kg <sup>-1</sup> | Total Fe<br>/g kg <sup>-1</sup> | Fe reduction rate<br>/g Fe kg <sup>-1</sup> d <sup>-1</sup> | Feammox rates<br>/mg N kg <sup>-1</sup> day <sup>-1</sup> |
|---------------------|-----------|------------------------------------------------------|---------------------------------|-------------------------------------------------------------|-----------------------------------------------------------|
| Tropical forest [6] | 4.27      | -                                                    | 6.2                             | -                                                           | 0.48                                                      |
| Paddy soils [7]     | 4.7-5.7   | 0.54-4.5                                             | 26-65                           | 0.02-0.86                                                   | 0.04-0.44                                                 |
| Yangtze Estuary [8] | 8.32-8.75 | 0.48-1.08                                            | -                               | 0.17-0.24                                                   | 0.24-0.36                                                 |
| Riparian zone [9]   | 7.23-7.43 | 0.94-1.53                                            | -                               | 0.19-0.26                                                   | 0.16-0.33                                                 |
| Mangrove [19]       | 7.49-7.70 | 1.04                                                 | 7.66                            | 0.28-0.44                                                   | 0.38-0.48                                                 |
| This study          | 5.0-8.0   | 2.7                                                  | 87.7                            | 0.39-0.83                                                   | 0.42-0.94                                                 |
